# Supplementary material for: Involving the public in research prioritisation and as research partners in the Wales COVID-19 Evidence Centre (2021-23): processes, research priorities, outputs, and lessons
Source: Research Square preprint supplement (doi:10.21203/rs.3.rs-3624819/v1), 2023-11-21
Supplement: Supplementary file 1 [file ce9dabf0244025e67fe385d8.docx]

**Supplementary Table 1: Summary of evidence priorities identified via the public and decision regarding inclusion in the WCEC work programme**

| **Group** | **Format & No. of attendees / participants** | **Top ten research priorities (agreed between each sub-group and ranked in order of priority)** | **Theme** | **Included in WCEC**  **Work programme?** | **Brief rationale / notes** |
| --- | --- | --- | --- | --- | --- |
| **Health and Care Research Wales Public Forum** | Health and Care Research Wales Public Forum event  May 2021  Pre-survey  n = 15  Online ranking  n = 33 | 1. Public’s attitudes towards mask wearing, social distancing, etc | Infection prevention and control | NO | Covered by ongoing WCEC evidence synthesis project. |
| 2. Public’s attitudes towards vaccination | Vaccination | NO | Covered by ongoing WCEC evidence synthesis project. |
| 3. Impact of the pandemic on the wellbeing of health and care staff | Mental health and wellbeing impact | YES | Significant issue with practice relevance. |
| 4. Impact of the pandemic on cancer screening and treatment | Health and care service delivery | YES | Significant issue with practice relevance. |
| 5. Impact of the pandemic on young people’s health and wellbeing | Mental health and wellbeing impact | NO | Covered by ongoing WCEC evidence synthesis project. |
| 6. Best ways to reduce the spread of COVID-19 | Infection prevention and control | YES | Significant issue with policy and practice relevance. |
| 7. Impact of the pandemic on care home residents | Health and care service delivery | NO | Important, but not urgently required. |
| 8. Impact of the pandemic on non-COVID-19 health conditions | Health and care service delivery | YES | Significant issue with practice relevance. |
| 9. Lessons that can be learnt from the changes made to health and care delivery during the pandemic | Health and care service delivery | NO | Important, but not urgently required and broad topic. |
| 10. Impact of the pandemic on mental health of the general population | Mental health and wellbeing impact | NO | Important, but not urgently required. |
| **SUPER Group** | Patient and public involvement group.  Completed stakeholder proforma  n = 15 | 1. What are the long term effects of COVID 19 and the best available treatments for long term symptoms? | Health impact | YES | Issue affecting significant proportion of population. |
| 2. What are the specific needs of Black, Asian and Ethnic Minority communities in responding to and recovering from the pandemic? | Inequalities | NO | Other WCEC evidence review projects exploring the specific pandemic-related needs of these communities and being explored by ongoing primary research study at another Welsh University. |
| 3. How has the pandemic affected people’s experience of bereavement in Wales? | Social impact | NO | Overlap with primary research already underway at another Welsh University. |
| 4. What is the impact of the evolving drugs used to treat COVID-19, often used for other chronic conditions and their interaction and overlap? | Treatment | NO | Important question but will be addressed by large scale international studies; beyond remit of WCEC. |
| 5. What are the best ways of improving people’s mental health in future lockdown situations? | Mental health and wellbeing impact | NO | Important, but not urgently required. |
| **Children and young people** | Workshop  Face-to-face (one workshop)  April 2022  n = 18 | 1. What impact has the pandemic had on young people whose health treatments & appointments have been delayed, what are their needs, and what support can we provide them? | Health and care service delivery | NO | Not as urgent as other priorities. |
| 2. What interventions can be used to address the backlog in children and young people's mental health services and what support can we provide whilst they are waiting for referrals / on waiting lists? | Mental health and wellbeing impact | NO | Covered by ongoing WCEC evidence synthesis project. |
| 3. Has the pandemic widened inequalities in education and what factors contributed to this? | Inequalities | NO | Covered by ongoing WCEC evidence synthesis project. |
| 4. What has been the impact of working from home / virtual working on eye-sight / back problems etc and how can we better support people? | Health impact | NO | Not as urgent as other priorities. |
| 5. Have there been improvements in health awareness in young people as a result of the pandemic? e.g. improved awareness of vaccines; benefits of social distancing; infection prevention | Infection prevention and control | NO | Not as urgent as other priorities. |
| 6. What were children and young people's experiences of COVID-19 related communications and messages and what impact did these messages have on mental health and wellbeing? | Communications and messaging | NO | Not as urgent as other priorities. |
| 7. What can we do to reduce the skills and education gap and support younger people compete in the job market against older workers who have not had the same level of disruption to their skills / education? | Education | NO | Not as urgent as other priorities in current context. |
| 8. Have new opportunities to be physically active, that have arisen during the pandemic (e.g. increase in virtual classes, increased awareness of free at-home workouts) impacted on physical activity levels in children and young people? | Health impact | NO | Not as urgent as other priorities. |
| 9. What are the experiences and needs of children who transitioned from paediatric to adult healthcare during the pandemic, and what interventions can we put in place to better support them? | Health and care service delivery | NO | Not as urgent as other priorities. |
| 10. What support will there be for those in Welsh medium schools whose parents do not speak Welsh and could not support their home learning during lockdowns? | Education | YES | Would be used to inform Welsh Government strategy. |
| **Taff Housing** | Workshop Face-to-face (two workshops)  n = 8  April 2022 | 1. How can we blend both virtual and in-person services? As some people not comfortable using technology. | Inequalities | NO | Covered by ongoing WCEC evidence synthesis project. |
| 2. How do we recover and how do we go back to the things we used to do before? Such as going to church, libraries, or the park to socialise with confidence | Social impact | NO | Gradual return to normal. Less urgent that other priorities. |
| 3. Better access to swimming pools, gyms and sports centres in Wales. What can be done to make it easier for people who struggle with technology and current barriers in place? | Social impact | NO | Beyond WCEC remit. |
| 4. How do we streamline health services into one system? Doctors, hospital, pharmacies - not having to repeat oneself at each step? | Health and care service delivery | NO | Beyond pandemic focus of Covered by ongoing WCEC evidence synthesis project. |
| 5. What is the recovery plan for mental health services in Wales? How can we ensure that it caters for everyone who needs it, not the most desperate? | Health and care service delivery | YES | Significant issue related to service recovery and important for long term planning. |
| 6. What impact did living with extended family have on peoples education, both children and young people and adult learners? | Social impact | NO | Not as urgent as other priorities. |
| 7. What was the impact of social community groups closing due to the pandemic - how did it affect people who could not access/use technology? | Social impact | NO | Not as urgent as other priorities. |
| 8. How many businesses and services closed due to the pandemic and what is the impact on local communities? | Employment and economic impact | NO | Beyond WCEC remit. |
| 9. More support services and companies providing budgeting tips to live - especially important with cost of living increase. | Employment and economic impact |  | Covered by WCEC cost of living reviews. |
| 10. What impact did COVID-19 have on living standards? | Social impact | YES | Highly relevant to current context in Wales. |
| **Ethnic Minorities and Youth Support Team Wales** | Workshop  Online (two workshops)  n = 13 | 1. What are the best strategies for overcoming digital exclusion, so that more people can realise the benefits of technology? | Inequalities | NO | Covered by ongoing WCEC evidence synthesis project. |
| 2. How can we prevent the ‘shock’ of future pandemics? What are the key lessons in Wales that could inform a pandemic / disaster plan? | Health and care service delivery | NO | Beyond remit of WCEC. Would likely be covered by national enquiry. |
| 3. What impact has the pandemic had on rates of domestic violence? What impact has this had on younger children who are part of the home environment and what are their support needs? | Social impact | YES | Significant issue impacting a group known to be disproportionately impacted by the pandemic. |
| 4. What are the barriers for those who have developed long covid integrating back into the workforce, training, or education? What interventions could be used to support them? | Health impact | YES | Significant issue of high policy relevance. |
| 5. What is the long term impact of missed school on primary and secondary children? Will they be disadvantaged in education and achievements and labelled later in life (e.g. by employers, higher education)? How can we support them to ‘catch up’? | Education | NO | Covered by ongoing WCEC evidence synthesis project. |
| 6. What has been the impact of COVID-19 on refugees arriving in Wales during the pandemic period? What are their outstanding needs? What ‘catch-up’ services / interventions are needed to support them? | Social impact | NO | Overlap with primary research already underway at another Welsh University. |
| 7. What has been the impact on mental health of people living in minority communities, across all age groups? How can we develop culturally appropriate services and appropriate training for staff delivery these services? Have certain groups been more affected by traumatic experiences and what support do they need? | Mental health and wellbeing impact | NO | Important issue, but unclear how the evidence would be used. |
| 8. What is the long-term psychological impact of the bereavement and grieving processes experienced during the pandemic? What additional support needs to be offered to these individuals? | Social impact | NO | Overlap with primary research already underway at another Welsh University. |
| 9. Which age groups are most likely to decline the vaccination? What can we do to encourage uptake of booster / initial vaccination in ethnic minority groups? | Vaccination | NO | Covered by ongoing WCEC evidence synthesis and primary research project. |
| 10. What has been the impact on access to mental health services and what needs to be done to address the backlog? | Health and care service delivery | YES | Significant issue related to service recovery and important for long term planning. |
| **Disability Wales** | Workshop  Online (two workshops, with sign language and palantypist support available)  n = 15 | 1. What are patients' experiences of remote healthcare access? What are the benefits (e.g. patient experience/ outcomes, environment, use of NHS resources) and disadvantages? Who does this approach work for / not work for? In which situations does it work best? Who might be disadvantaged? | Health and care service delivery | NO | Covered by ongoing WCEC evidence synthesis project. |
| 2. How can we develop a robust strategy to identify who the vulnerable and clinically vulnerable from COVID-19 are? | Health and care service delivery | NO | Overlap with a primary research study being conducted at another Welsh University. |
| 3. What impact has the pandemic had on healthcare services for people with chronic conditions? | Health and care service delivery | YES | Significant issue for the Welsh population and relevant to current pandemic context. |
| 4. Is long covid linked to the seriousness of initial COVID-19 illness? | Health impact | NO | Overlap with large-scale national primary research study; beyond remit of WCEC. |
| 5. What impact has the pandemic had on pre-existing inequalities experienced by disabled people in health / education / employment / social care etc? | Inequalities | YES | Significant issue impacting a group known to be disproportionately impacted by the pandemic. |
| 6. What have been the advantages / disadvantages of home working for disabled people? What worked / did not work? How can we support disabled people to become part of a hybrid workforce? | Employment and economic impact | NO | Important issue, but not as relevant to the current pandemic context. |
| 7. What were the publics' experiences of Government communications during the pandemic? What worked / did not work? How can we improve messaging / communication strategies for future infectious disease outbreaks / pandemics / emergency situations? | Communications and messaging | NO | Not urgent priority. Overlap with other ongoing primary research studies at another Welsh University. |
| 8. What can we learn from the COVID-19 vaccination roll-out in Wales so that we are better prepared for a new infectious disease outbreak / pandemic? | Vaccination | NO | Overlap with ongoing WCEC primary research study. |
| 9. A significant proportion of people with long covid will now be classified as disabled? What has been the mental and physical impact on these people? What support services are available? What are the support needs of this group of people? What services do we need to put in place? | Health impact | NO | Overlap with ongoing WCEC evidence synthesis and primary research study. |
| 10. How is long covid defined? | Treatment | NO | Better addressed by large-scale / international longitudinal studies; beyond remit of WCEC. |
